# Supplementary material for: Small molecule Photoregulin3 prevents retinal degeneration in the RhoP23H mouse model of retinitis pigmentosa
Source: eLife. 2017 Nov 17;6:e30577. doi: 10.7554/eLife.30577 (PMC5693111; doi:10.7554/eLife.30577)
Supplement: Figure 1—source data 1. [file elife-30577-fig1-data1.xlsx]

## Sheet: Figure 1
1B
	Biological Replicate 1	Biological Replicate 2	Biological Replicate 3	mean
PR1 0.03 uM	0.774126	0.857135	1.2524	0.96122
PR1 0.1 uM	0.803202	1.13216	1.24709	1.06082
PR1 0.3 uM	0.993363	0.807454	0.790385	0.863734
PR1 1 uM	0.502944	0.708723	0.653157	0.621608
PR1 3 uM	0.491517	0.456519	0.415924	0.454653
PR3 0.03 uM	0.795726	0.812735	1.13889	0.915782
PR3 0.1 uM	0.769354	0.625326	0.793403	0.729361
PR3 0.3 uM	0.47982	0.364348	0.332049	0.392072
PR3 1 uM	0.287976	0.30687	0.391939	0.328929
PR3 3 uM	0.348828	0.316642	0.479908	0.381792
1C
	Rhodopsin (ΔCt from Gapdh)
	Biological Replicate 1	Biological Replicate 2	Biological Replicate 3	Biological Replicate 4	mean
DMSO	-1.85667	-3.01667	-1.57		-2.14778
PR1 0.3uM	-2.44667	-2.13	-1.98667	-2.44333	-2.25167
PR3 0.3uM	-3.83333	-4.40333	-4.19667	-5.34	-4.44333
	Otx2 (ΔCt from Gapdh)
	Biological Replicate 1	Biological Replicate 2	Biological Replicate 3	Biological Replicate 4
DMSO	-4.04	-3.50667	-4.04333		-3.86333
PR1 0.3uM	-4.09	-4.08333	-3.39333	-4.42333	-3.9975
PR3 0.3uM	-3.94333	-3.63667	-3.49	-4.24333	-3.82833
1E
	Dorsal
	Biological Replicate 1	Biological Replicate 2	Biological Replicate 3	mean
DMSO	3	1	1	1.66667
PR3 0.3uM	1	1	1	1
	Ventral
	Biological Replicate 1	Biological Replicate 2	Biological Replicate 3	mean
DMSO	44	62	71	59
PR3 0.3uM	99	103	110	104
1G
	Wild type
	Rhodopsin (ΔCt from Gapdh)
	Biological Replicate 1	Biological Replicate 2	Biological Replicate 3	Biological Replicate 4	mean
DMSO	1.61333	1.19	0.28	1.06	1.03583
PR3 1uM	-0.646667	0.0466667	-0.493333	0.693333	-0.1
	Rd7
	Rhodopsin (ΔCt from Gapdh)
	Biological Replicate 1	Biological Replicate 2	Biological Replicate 3	Biological Replicate 4	mean
DMSO	0.736667	0.353333	-0.51	-0.89	-0.0775
PR3 1uM	-0.746667	-0.54	-1.63	-0.606667	-0.880833
