# Supplementary material for: Small molecule Photoregulin3 prevents retinal degeneration in the RhoP23H mouse model of retinitis pigmentosa
Source: eLife. 2017 Nov 17;6:e30577. doi: 10.7554/eLife.30577 (PMC5693111; doi:10.7554/eLife.30577)
Supplement: Figure 2—source data 1. [file elife-30577-fig2-data1.xlsx]

## Sheet: FIgure 2
2D
	Dorsal
	Biological Replicate 1	Biological Replicate 2	Biological Replicate 3	Biological Replicate 4	mean
DMSO	7	6	6	8	6.75
PR3 10mg/kg	8	6	5	5	6
	Ventral
	Biological Replicate 1	Biological Replicate 2	Biological Replicate 3	Biological Replicate 4	mean
DMSO	230	186	197	233	211.5
PR3 10mg/kg	265	281	256	251	263.25
