# Supplementary material for: Small molecule Photoregulin3 prevents retinal degeneration in the RhoP23H mouse model of retinitis pigmentosa
Source: eLife. 2017 Nov 17;6:e30577. doi: 10.7554/eLife.30577 (PMC5693111; doi:10.7554/eLife.30577)
Supplement: Figure 3—source data 1. [file elife-30577-fig3-data1.xlsx]

## Sheet: Figure 3
Figure 3
	3C					3D		Recoverin	Rhodopsin	S Opsin
	Animal Number	Treatment	Center	Periphery		Animal Number	Treatment	ΔCt from Gapdh	ΔCt from Gapdh	ΔCt from Gapdh
	836	DMSO	2	4		836	DMSO	-3.60333	-5.8	-4.53
	838	DMSO	2	3		838	DMSO	-3.48	-4.91333	-4.66
	840	DMSO	1	4		840	DMSO	-3.65	-5.16333	-3.27333
	110	DMSO	1	2		138	DMSO	-3.13	-4.54667	-2.94667
	112	DMSO	1	2		140	DMSO	-3.88	-5.27667	-5.33667
	114	DMSO	4	7		142	DMSO	-3.28667	-5.13	-3.38667
	116	DMSO	1	2			mean	-3.505	-5.13833	-4.02222
		mean	1.71429	3.42857			standard dev	0.268417	0.414325	0.950152
		standard dev	1.1127	1.81265
						835	PR3	-1.61333	-1.91	-2.74667
	835	PR3	4	8		837	PR3	-2.19	-3.72333	-4.21
	837	PR3	4	5		839	PR3	-2.34667	-2.87333	-3.97667
	839	PR3	3	6		137	PR3	-0.826667	-1.24333	-2.1
	109	PR3	4	4		139	PR3	-1.93333	-2.37333	-2.75333
	111	PR3	3	5		141	PR3	-2.13667	-3.19	-2.79
	113	PR3	3	6		143	PR3	-1.75	-2.90667	-3.13
	115	PR3	4	5			mean	-1.8281	-2.60286	-3.10095
	117	PR3	3	6			standard dev	0.510108	0.831334	0.746398
		mean	3.5	5.625
		standard dev	0.534522	1.18773
