# Supplementary material for: Small molecule Photoregulin3 prevents retinal degeneration in the RhoP23H mouse model of retinitis pigmentosa
Source: eLife. 2017 Nov 17;6:e30577. doi: 10.7554/eLife.30577 (PMC5693111; doi:10.7554/eLife.30577)
Supplement: Figure 4—source data 1. [file elife-30577-fig4-data1.xlsx]

## Sheet: Figure 4
Figure 4
		Scotopic (db)									Photopic (dB)
Animal Number	Treatment	-50	-30	-10	0	10	20	30	50		0	30	50	100
110	DMSO	0	0	0	39.78	32.24	34.52	39	33.58		0	14.13	14.55	26.46
112	DMSO	0	0	0	49.22	35.17	57.68	41.62	50.24		32.53	42.22	40.09	60.71
114	DMSO	0	0	0	0	21.32	26.51	41.62	23.89		0	21.07	24.54	23.27
116	DMSO	0	0	0	25.27	57.39	50.57	54.35	69.88		52.92	43.56	51.38	36.39
	mean	0	0	0	28.5675	36.53	42.32	44.1475	44.3975		21.3625	30.245	32.64	36.7075
	standard dev	0	0	0	21.4416	15.1299	14.3154	6.91289	20.1748		26.034	14.8836	16.3253	16.9489
109	PR3	0	0	0	54.32	86.55	98.69	109.75	87.31		33.75	65.01	52.81	67.99
111	PR3	0	0	0	26.25	38.23	27.14	42.39	60.88		41.09	37.76	38.42	35.08
113	PR3	0	0	0	95.64	98.1	82.04	77.43	106.23		53.48	55.91	62.58	73.61
115	PR3	0	0	0	47.5	47.11	62.82	64.63	71.93		26.1	58.06	60.11	50.89
117	PR3	0	0	0	60.8	105.2	112.19	140.94	127.12		42.37	99.33	102.88	108.37
835	PR3	0	0	0	121.1	149.59	186.06	200.49	217.2		114.05	106.42	143.3	105.01
837	PR3	0	0	0	65.55	45.55	41.98	49.01	54.91		10.76	15.81	22.26	68.75
839	PR3	0	0	0	87.11	114.33	112.77	113.9	125.9		48.75	78.3	62.48	59.83
	mean	0	0	0	69.7837	85.5825	90.4613	99.8175	106.435		46.2937	64.575	68.105	71.1912
	standard dev	0	0	0	30.0752	39.2626	49.8163	53.1059	52.5929		30.5166	30.1474	38.1848	25.0521
